# Supplementary material for: 環状ケトエノール系殺虫・殺ダニ剤の開発について (食料自給率の向上に向けて--農薬の役割を問う)
Source: Frontiers journal article supplement (doi:10.3389/fphar.2022.837652), 2008-09-01
Supplement: Data_Sheet_1.PDF [file Data_Sheet_1.PDF]

## Supplementary figures

### Supp. Figure 1

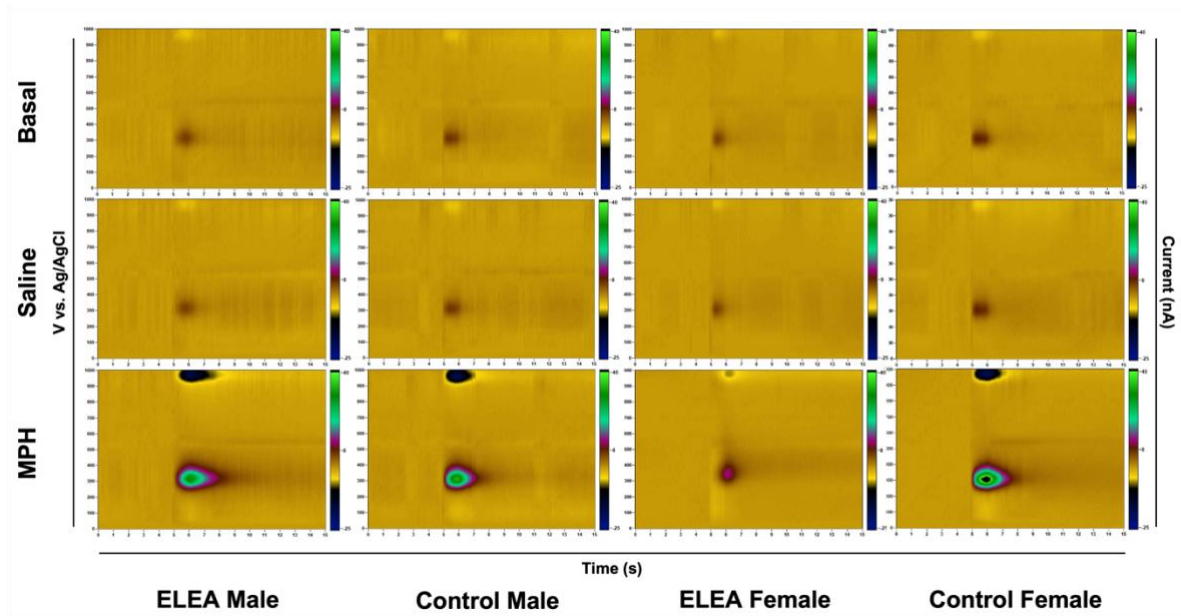

Color plots of representative peak high of striatal DA release evoked by electrical stimulation in basal, saline (1 mL/Kg, i.p.) and MPH (5 mg/Kg, i.p.) conditions. MPH color plot represents the highest peak registered, at 45 min.

### Supp. Figure 2

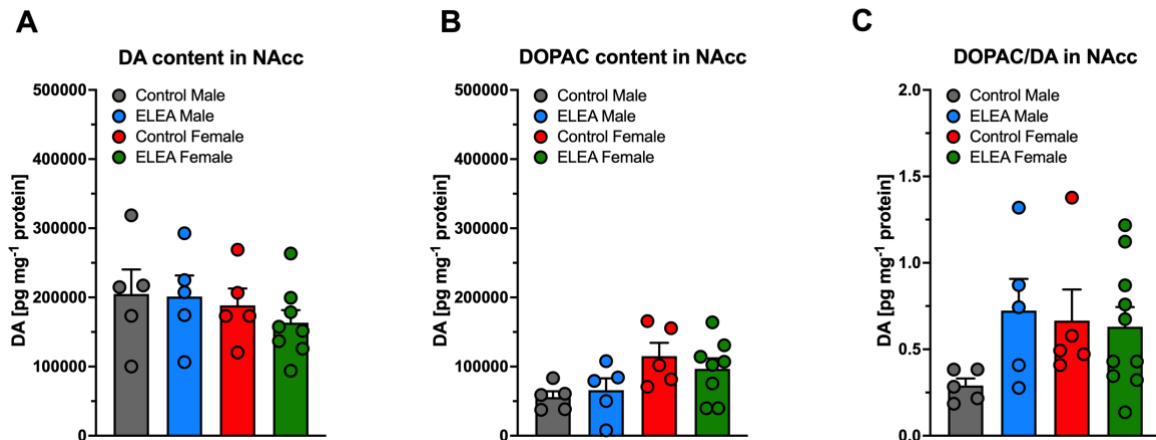

DA and DOPAC content of NAcc. There were no differences within the experimental groups.

Supp. Figure 3

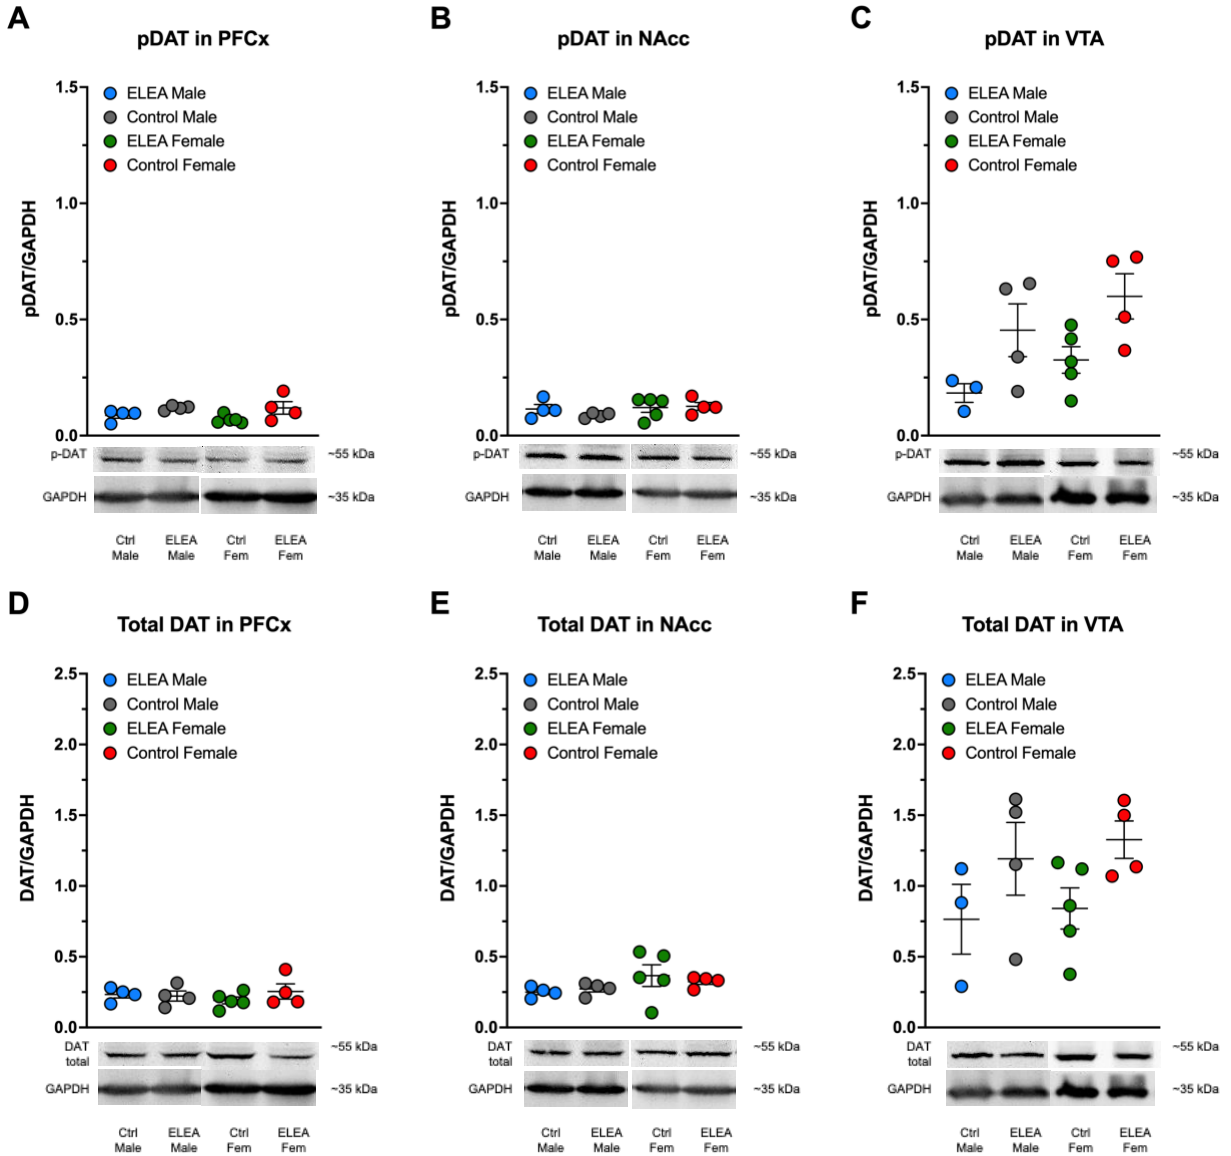

pDAT and total DAT protein levels expression from mesocorticolimbic system. No differences were observed in DAT expression within the mesocorticolimbic system.
